# Supplementary material
Source: Springer Nature journal article supplement (https://www.springermedizin.de/resource/supplementary/13063_2012_1098_MOESM7_ESM.pdf/9619700)
Supplement: MOESM7 [file 9619700]



**EA-level characteristics:**

Presence of gated communities

Property redevelopments

Displacement of populations

CA retention

**Individual characteristics:**

Age

Occupation

Place of work

Marital status

Duration of relationship

**Exposure to**

**SASA!**
